# Supplementary material for: Kinetochore-microtubule stability governs the metaphase requirement for Eg5
Source: PubMed Central journal article supplement — Mol Biol Cell. 2014 Jul 1;25(13):2051–60. doi: 10.1091/mbc.E14-03-0785 (PMC4072578; doi:10.1091/mbc.e14-03-0785), 2014-07-01
Supplement: supp_E14-03-0785v1_CombinedSupMats.pdf [file supp_E14-03-0785v1_CombinedSupMats.pdf]

# Supplemental Materials

*Molecular Biology of the Cell*

Gayek et al.

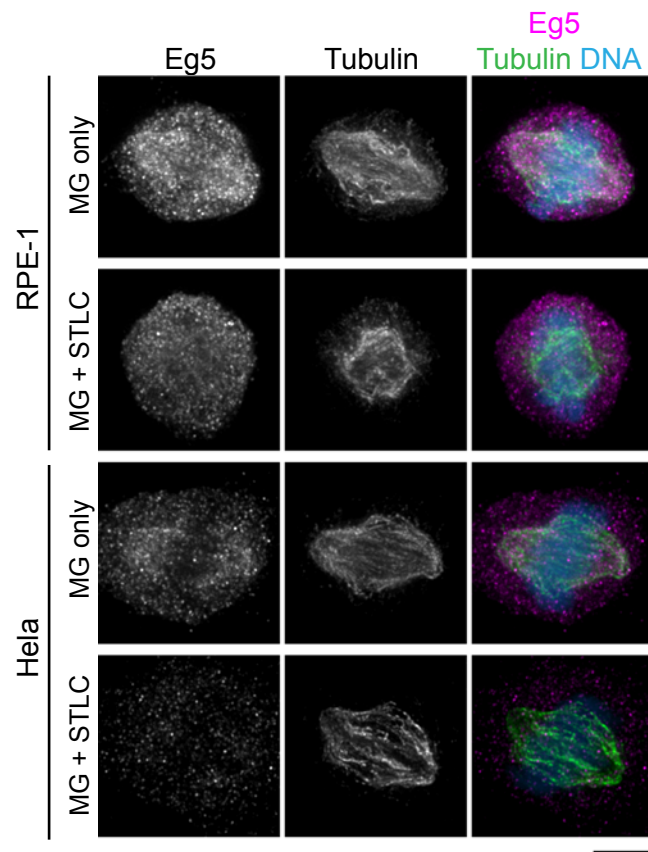

**Figure S1.** STLC displaces Eg5 from the spindle in RPE-1 and HeLa cells. Cells were arrested in mitosis with 5  $\mu$ M MG-132 for 90 min, then treated with MG-132 with or without 10  $\mu$ M STLC for 10 min. Eg5 (magenta) and tubulin (green) were detected by immunostaining. DNA (blue) was counterstained with Hoechst 33342. LUTs were scaled identically. Scale bar, 5  $\mu$ m.

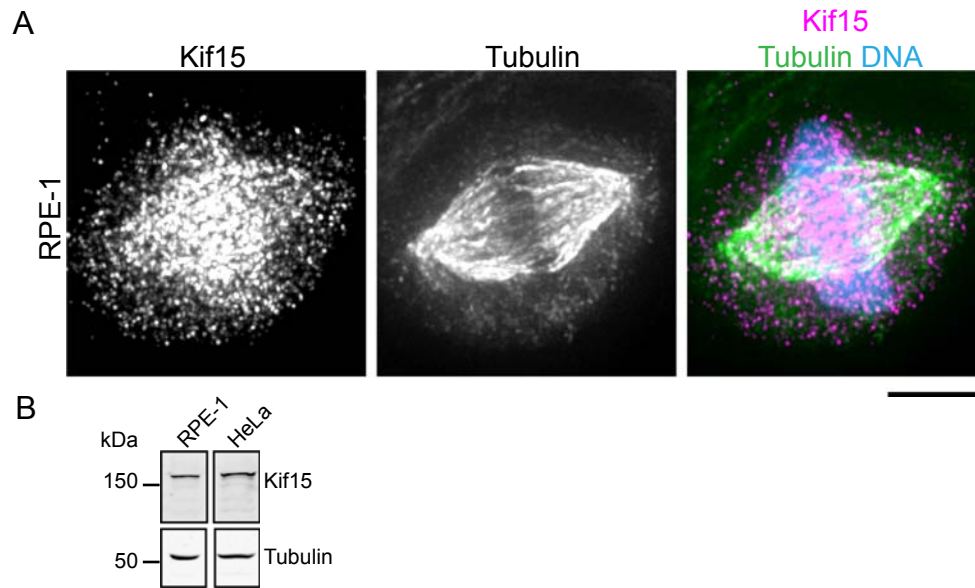

**Figure S2.** Kif15 expression and localization in RPE-1 cells. A) Kif15 binds the spindle in RPE-1 cells. Cells were treated with 5  $\mu$ M MG-132 for 90 min. Kif15 (magenta) and tubulin (green) were detected by immunostaining. DNA (blue) was counterstained with Hoechst 33342. Scale bar, 5  $\mu$ m. B) Immunoblots of Kif15 against mitotic lysates prepared from RPE-1 and HeLa cells. Tubulin is shown as a loading control.

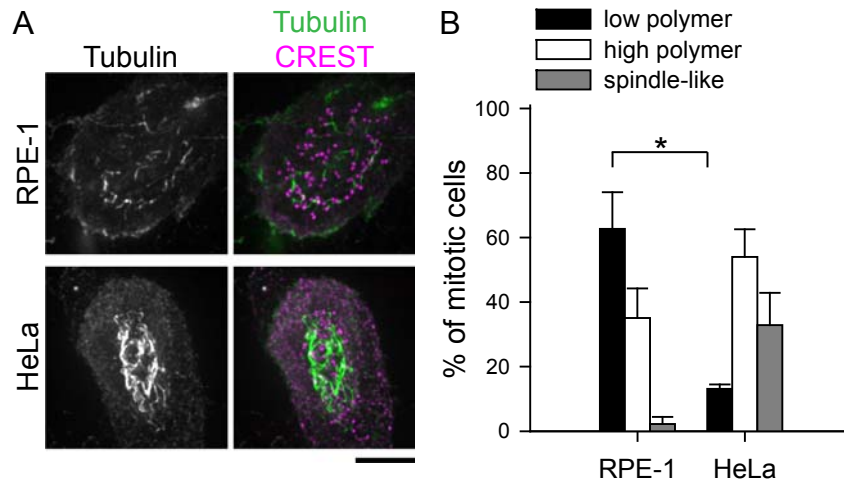

**Figure S3.** Cold treatment reveals differential K-MT stability in RPE-1 and HeLa cells. A) Images of RPE-1 or HeLa cells arrested in mitosis with 5  $\mu$ M MG-132 for 90 min, then placed on ice with 5  $\mu$ M MG-132 for 29 min, extracted on ice for 1 min, and fixed. Tubulin (green) and kinetochores (magenta; CREST) were detected by immunostaining. LUTs were scaled identically. Scale bar, 5  $\mu$ m. B) Quantification of residual MT polymer levels following cold treatment. Puncta or short streaks were scored as “low polymer;” long streaks joined at nodes were scored as “high polymer;” long streaks joined in two poles were scored as “spindle-like.” Data represent the mean  $\pm$  SEM;  $n \geq 79$  cells from 3 experiments. \* $p < 0.05$ .

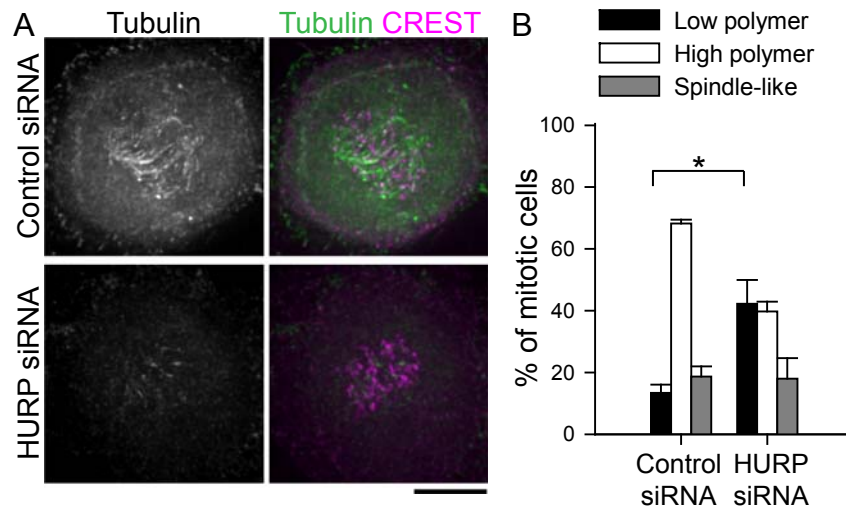

**Figure S4.** HURP depletion destabilizes K-MTs. A) HeLa cells transfected with control or HURP siRNAs were arrested in mitosis with 5  $\mu$ M MG-132 for 90 min, then treated with 5  $\mu$ M nocodazole for 6 min, extracted for 20 sec, and fixed. Tubulin (green) and kinetochores (magenta; CREST) were detected by immunostaining. LUTs were scaled identically. Scale bar, 5  $\mu$ m. B) Quantification of residual MT polymer levels following nocodazole treatment. Puncta or short streaks were scored as “low polymer;” long streaks joined at nodes were scored as “high polymer;” long streaks joined in two poles were scored as “spindle-like.” Data represent the mean  $\pm$  SEM;  $n \geq 100$  cells from at least 3 experiments. \* $p=0.052$ .

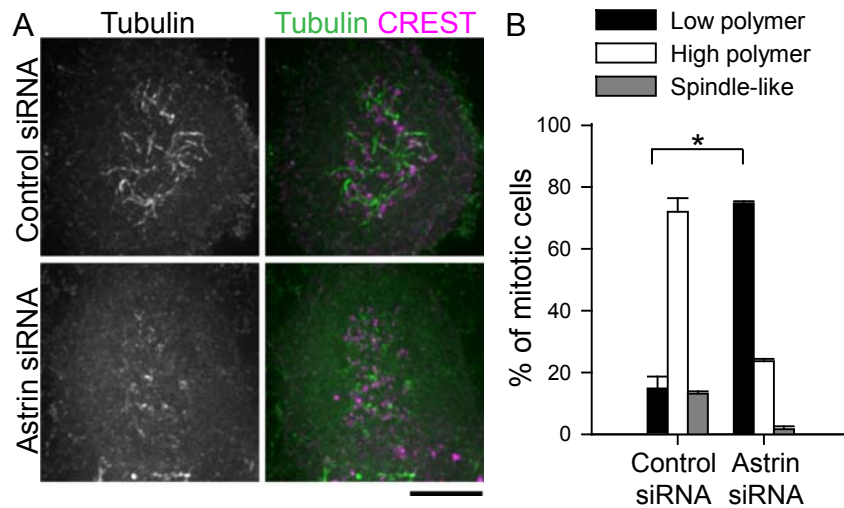

**Figure S5.** Astrin depletion destabilizes K-MTs. A) HeLa cells transfected with control or Astrin siRNA were arrested in mitosis with 5  $\mu$ M MG-132 for 90 min, then treated with 5  $\mu$ M nocodazole for 6 min, extracted for 20 sec, and fixed. Tubulin (green) and kinetochores (magenta; CREST) were detected by immunostaining. LUTs were scaled identically. Scale bar, 5  $\mu$ m. B) Quantification of residual MT polymer levels following nocodazole treatment. Puncta or short streaks were scored as “low polymer;” long streaks joined at nodes were scored as “high polymer;” long streaks joined in two poles were scored as “spindle-like.” Data represent the mean  $\pm$  SEM;  $n \geq 100$  cells from at least 3 experiments. \* $p < 0.005$ .
